# Supplementary material
Source: publisher site journal article supplement (https://www.dovepress.com/article/176172)
Supplement: Supplementary file 1 [file get_supplementary_file.php%3Ff%3D176172.pdf]

## Supplementary materials

| Source: PubMed (Searched on: 5 June 2018) |                                                                                                                                                                                                                                                                        |             |
|-------------------------------------------|------------------------------------------------------------------------------------------------------------------------------------------------------------------------------------------------------------------------------------------------------------------------|-------------|
| Search                                    | Query                                                                                                                                                                                                                                                                  | Items found |
| #118                                      | Search #117 AND #95 AND #93                                                                                                                                                                                                                                            | 249         |
| #117                                      | Search #96 OR #97 OR #98 OR #99 OR #100 OR #101 OR #102 OR #103 OR #104 OR #105 OR #106 OR #107 OR #108 OR #109 OR #110 OR #111 OR #112 OR #113 OR #114 OR #115 OR #116                                                                                                | 1194648     |
| #116                                      | Search tripleblind*[Title/Abstract]                                                                                                                                                                                                                                    | 3           |
| #115                                      | Search trebleblind*[Title/Abstract]                                                                                                                                                                                                                                    | 0           |
| #114                                      | Search doubleblind*[Title/Abstract]                                                                                                                                                                                                                                    | 227         |
| #113                                      | Search singleblind*[Title/Abstract]                                                                                                                                                                                                                                    | 14          |
| #112                                      | Search blind*[Title/Abstract]                                                                                                                                                                                                                                          | 266997      |
| #111                                      | Search random*[Title/Abstract]                                                                                                                                                                                                                                         | 978600      |
| #110                                      | Search "Double-Blind Method"[Mesh]                                                                                                                                                                                                                                     | 145896      |
| #109                                      | Search "Single-Blind Method"[Mesh]                                                                                                                                                                                                                                     | 25194       |
| #108                                      | Search "Pragmatic Clinical Trials as Topic"[Title/Abstract]                                                                                                                                                                                                            | 4           |
| #107                                      | Search "Randomized Controlled Trials"[Publication Type]                                                                                                                                                                                                                | 0           |
| #106                                      | Search "Controlled Clinical Trials"[Publication Type]                                                                                                                                                                                                                  | 0           |
| #105                                      | Search "Clinical Trials, Phase IV"[Publication Type]                                                                                                                                                                                                                   | 0           |
| #104                                      | Search "Clinical Trials, Phase III"[Publication Type]                                                                                                                                                                                                                  | 0           |
| #103                                      | Search "Clinical Trials, Phase II"[Publication Type]                                                                                                                                                                                                                   | 0           |
| #102                                      | Search "Pragmatic Clinical Trials as Topic"[Mesh]                                                                                                                                                                                                                      | 188         |
| #101                                      | Search "Intention to Treat Analysis"[Mesh]                                                                                                                                                                                                                             | 2048        |
| #100                                      | Search "Randomized Controlled Trials as Topic"[Mesh]                                                                                                                                                                                                                   | 118445      |
| #99                                       | Search "Controlled Clinical Trials as Topic"[Mesh]                                                                                                                                                                                                                     | 123315      |
| #98                                       | Search "Clinical Trials, Phase IV as Topic"[Mesh]                                                                                                                                                                                                                      | 267         |
| #97                                       | Search "Clinical Trials, Phase III as Topic"[Mesh]                                                                                                                                                                                                                     | 8231        |
| #96                                       | Search "Clinical Trials, Phase II as Topic"[Mesh]                                                                                                                                                                                                                      | 7024        |
| #95                                       | Search #5 OR #9 OR #18 OR #29 OR #32 OR #40 OR #49 OR #56                                                                                                                                                                                                              | 8941        |
| #94                                       | Search #57 OR #58 OR #59 OR #60 OR #61 OR #62 OR #63 OR #64 OR #65 OR #66 OR #67 OR #68 OR #69 OR #70 OR #71 OR #72 OR #73 OR #74 OR #75 OR #76 OR #77 OR #78 OR #79 OR #80 OR #81 OR #82 OR #83 OR #84 OR #85 OR #86 OR #87 OR #88 OR #89 OR #90 OR #91 OR #92 OR #93 | 335222      |
| #93                                       | Search "Mammary Neoplasm, Human"[Title/Abstract]                                                                                                                                                                                                                       | 0           |
| #92                                       | Search "Neoplasms, Human Mammary"[Title/Abstract]                                                                                                                                                                                                                      | 0           |
| #91                                       | Search "Neoplasm, Human Mammary"[Title/Abstract]                                                                                                                                                                                                                       | 0           |
| #90                                       | Search "Human Mammary Neoplasms"[Title/Abstract]                                                                                                                                                                                                                       | 4           |
| #89                                       | Search "Human Mammary Neoplasm"[Title/Abstract]                                                                                                                                                                                                                        | 0           |
| #88                                       | Search "Mammary Neoplasms, Human"[Title/Abstract]                                                                                                                                                                                                                      | 0           |
| #87                                       | Search "Mammary Carcinomas, Human"[Title/Abstract]                                                                                                                                                                                                                     | 0           |
| #86                                       | Search "Human Mammary Carcinomas"[Title/Abstract]                                                                                                                                                                                                                      | 155         |

---

|     |                                                                                                                         |        |
|-----|-------------------------------------------------------------------------------------------------------------------------|--------|
| #85 | Search "Carcinomas, Human Mammary"[Title/Abstract]                                                                      | 0      |
| #84 | Search "Carcinoma, Human Mammary"[Title/Abstract]                                                                       | 0      |
| #83 | Search "Mammary Carcinoma, Human"[Title/Abstract]                                                                       | 0      |
| #82 | Search "Carcinomas, Breast"[Title/Abstract]                                                                             | 0      |
| #81 | Search "Carcinoma, Breast"[Title/Abstract]                                                                              | 1      |
| #80 | Search "Breast Carcinomas"[Title/Abstract]                                                                              | 7831   |
| #79 | Search "Breast Carcinoma"[Title/Abstract]                                                                               | 23270  |
| #78 | Search "Cancer of Breast"[Title/Abstract]                                                                               | 98     |
| #77 | Search "Breast Malignant Tumors"[Title/Abstract]                                                                        | 17     |
| #76 | Search "Breast Malignant Tumor"[Title/Abstract]                                                                         | 10     |
| #75 | Search "Malignant Tumor of Breast"[Title/Abstract]                                                                      | 3      |
| #74 | Search "Breast Malignant Neoplasms"[Title/Abstract]                                                                     | 2      |
| #73 | Search "Breast Malignant Neoplasm"[Title/Abstract]                                                                      | 2      |
| #72 | Search "Malignant Neoplasm of Breast"[Title/Abstract]                                                                   | 3      |
| #71 | Search "Mammary Cancers"[Title/Abstract]                                                                                | 426    |
| #70 | Search "Cancers, Mammary"[Title/Abstract]                                                                               | 0      |
| #69 | Search "Cancer, Mammary"[Title/Abstract]                                                                                | 3      |
| #68 | Search "Mammary Cancer"[Title/Abstract]                                                                                 | 2993   |
| #67 | Search "Cancer of the Breast"[Title/Abstract]                                                                           | 2778   |
| #66 | Search "Cancer, Breast"[Title/Abstract]                                                                                 | 10     |
| #65 | Search "Breast Cancer"[Title/Abstract]                                                                                  | 235278 |
| #64 | Search "Neoplasm, Breast"[Title/Abstract]                                                                               | 1      |
| #63 | Search "Breast Neoplasm"[Title/Abstract]                                                                                | 597    |
| #62 | Search "Neoplasms, Breast"[Title/Abstract]                                                                              | 0      |
| #61 | Search "Tumor, Breast"[Title/Abstract]                                                                                  | 1      |
| #60 | Search "Breast Tumor"[Title/Abstract]                                                                                   | 8653   |
| #59 | Search "Breast Tumors"[Title/Abstract]                                                                                  | 10255  |
| #58 | Search "Tumors, Breast"[Title/Abstract]                                                                                 | 1      |
| #57 | Search "Breast Neoplasms"[Mesh]                                                                                         | 263603 |
| #56 | Search #50 OR #51 OR #52 OR #53 OR #54 OR #55                                                                           | 299    |
| #55 | Search "PD-0332991"[Title/Abstract]                                                                                     | 75     |
| #54 | Search "PD0332991"[Title/Abstract]                                                                                      | 65     |
| #53 | Search "PD 0332991"[Title/Abstract]                                                                                     | 75     |
| #52 | Search "Ibrance"[Title/Abstract]                                                                                        | 14     |
|     | Search                                                                                                                  |        |
| #51 | "6-acetyl-8-cyclopentyl-5-methyl-2-(5-piperazin-1-ylpyridin-2-ylamino)-8H-pyrido(2,3-d)pyrimidin-7-one"[Title/Abstract] | 0      |
| #50 | Search "palbociclib" [Supplementary Concept]                                                                            | 245    |
| #49 | Search #41 OR #42 OR #43 OR #44 OR #45 OR #46 OR #47 OR #48                                                             | 3368   |
| #48 | Search "Faslodex"[Title/Abstract]                                                                                       | 214    |
| #47 | Search "ZM-182780"[Title/Abstract]                                                                                      | 18     |
| #46 | Search "ZM 182780"[Title/Abstract]                                                                                      | 18     |
| #45 | Search "ICI-182780"[Title/Abstract]                                                                                     | 456    |

---

---

|     |                                                                                                                                    |      |
|-----|------------------------------------------------------------------------------------------------------------------------------------|------|
| #44 | Search "ICI 182,780"[Title/Abstract]                                                                                               | 1767 |
| #43 | Search "ICI 182780"[Title/Abstract]                                                                                                | 456  |
| #42 | Search<br>"7-(9-(4,4,5,5,5-pentafluoropentylsulfanyl)nonyl)estra-1,3,5(10)-tri<br>ene-3,17-diol"[Title/Abstract]                   | 0    |
| #41 | Search "fulvestrant" [Supplementary Concept]                                                                                       | 2123 |
| #40 | Search Search #33 OR #34 OR #35 OR #36 OR #37 OR #38 OR<br>#39                                                                     | 819  |
| #39 | Search Zactima[Title/Abstract]                                                                                                     | 38   |
| #38 | Search vandetanib[Title/Abstract]                                                                                                  | 603  |
| #37 | Search "ZD-6474"[Title/Abstract]                                                                                                   | 10   |
| #36 | Search "ZD6474"[Title/Abstract]                                                                                                    | 190  |
| #35 | Search "ZD 6474"[Title/Abstract]                                                                                                   | 10   |
| #34 | Search caprelsa[Title/Abstract]                                                                                                    | 12   |
| #33 | Search<br>"N-(4-bromo-2-fluorophenyl)-6-methoxy-7-((1-methylpiperidin-4-<br>yl)methoxy)quinazolin-4-amine" [Supplementary Concept] | 458  |
| #32 | Search #30 OR #31                                                                                                                  | 68   |
| #31 | Search LEE011[Title/Abstract]                                                                                                      | 38   |
| #30 | Search "ribociclib" [Supplementary Concept]                                                                                        | 50   |
| #29 | Search #19 OR #20 OR #21 OR #22 OR #23 OR #24 OR #25 OR<br>#26 OR #27 OR #28                                                       | 4057 |
| #28 | Search "Certican"[Title/Abstract]                                                                                                  | 70   |
| #27 | Search "Afinitor"[Title/Abstract]                                                                                                  | 53   |
| #26 | Search "RAD001"[Title/Abstract]                                                                                                    | 478  |
| #25 | Search "001, RAD"[Title/Abstract]                                                                                                  | 2    |
| #24 | Search "RAD 001"[Title/Abstract]                                                                                                   | 32   |
| #23 | Search "40-O-(2-hydroxyethyl)-rapamycin"[Title/Abstract]                                                                           | 25   |
| #22 | Search "SDZ-RAD"[Title/Abstract]                                                                                                   | 66   |
| #21 | Search "RAD, SDZ"[Title/Abstract]                                                                                                  | 0    |
| #20 | Search " SDZ RAD"[Title/Abstract]                                                                                                  | 66   |
| #19 | Search "Everolimus"[Mesh]                                                                                                          | 3838 |
| #18 | Search #10 OR #11 OR #12 OR #13 OR #14 OR #15 OR #16 OR<br>#17                                                                     | 165  |
| #17 | Search "CHIR-258"[Title/Abstract]                                                                                                  | 11   |
| #16 | Search "CHIR258"[Title/Abstract]                                                                                                   | 5    |
| #15 | Search "CHIR 258"[Title/Abstract]                                                                                                  | 11   |
| #14 | Search "dovitinib"[Title/Abstract]                                                                                                 | 122  |
| #13 | Search "TKI-258"[Title/Abstract]                                                                                                   | 10   |
| #12 | Search TKI258[Title/Abstract]                                                                                                      | 50   |
| #11 | Search "TKI 258"[Title/Abstract]                                                                                                   | 10   |
| #10 | Search<br>"4-amino-5-fluoro-3-(5-(4-methylpiperazin-1-yl)-1H-benzimidazol<br>-2-yl)quinolin-2(1H)-one" [Supplementary Concept]     | 96   |

---

---

|    |                                                                                                                                                                       |     |
|----|-----------------------------------------------------------------------------------------------------------------------------------------------------------------------|-----|
| #9 | Search #6 OR #7 OR #8                                                                                                                                                 | 248 |
| #8 | Search BKM120[Title/Abstract]                                                                                                                                         | 169 |
| #7 | Search buparlisib[Title/Abstract]                                                                                                                                     | 78  |
| #6 | Search "NVP-BKM120" [Supplementary Concept]                                                                                                                           | 135 |
| #5 | Search #1 OR #2 OR #3 OR #4                                                                                                                                           | 104 |
| #4 | Search LY2385219[Title/Abstract]                                                                                                                                      | 0   |
| #3 | Search LY2835210[Title/Abstract]                                                                                                                                      | 0   |
| #2 | Search abemaciclib[Title/Abstract]                                                                                                                                    | 97  |
| #1 | Search<br>"5-(4-ethylpiperazin-1-ylmethyl)pyridin-2-yl)-(5-fluoro-4-(7-fluoro-3-isopropyl-2-methyl-3H-benzimidazol-5-yl)pyrimidin-2-yl)amine" [Supplementary Concept] | 34  |

---

Source: EMBASE (Searched on: 5 June 2018)

| No.  | Query                                                                                                                   | Results |
|------|-------------------------------------------------------------------------------------------------------------------------|---------|
| #151 | #125 AND #135 AND #150                                                                                                  | 1814    |
| #150 | #136 OR #137 OR #138 OR #139 OR #140 OR #141 OR #142 OR #143<br>OR #144 OR #145 OR #146 OR #147 OR #148 OR #149         | 1605765 |
| #149 | 'tripleblind*':ab,ti                                                                                                    | 7       |
| #148 | 'trebleblind*':ab,ti                                                                                                    | 0       |
| #147 | 'doubleblind*':ab,ti                                                                                                    | 2801    |
| #146 | 'singleblind*':ab,ti                                                                                                    | 227     |
| #145 | 'blind*':ab,ti                                                                                                          | 369624  |
| #144 | 'random*':ab,ti                                                                                                         | 1293251 |
| #143 | 'double blind procedure'/exp                                                                                            | 149249  |
| #142 | 'single blind procedure'/exp                                                                                            | 31422   |
| #141 | 'randomized controlled trial (topic)'/exp                                                                               | 142073  |
| #140 | 'controlled clinical trial (topic)'/exp                                                                                 | 147995  |
| #139 | 'phase 4 clinical trial (topic)'/exp                                                                                    | 1374    |
| #138 | 'phase 3 clinical trial (topic)'/exp                                                                                    | 31042   |
| #137 | 'phase 2 clinical trial (topic)'/exp                                                                                    | 30556   |
| #136 | 'multicenter study (topic)'/exp                                                                                         | 26177   |
| #135 | #126 OR #127 OR #128 OR #129 OR #130 OR #131 OR #132 OR #133<br>OR #134                                                 | 412000  |
| #134 | 'mammary gland cancer':ab,ti                                                                                            | 205     |
| #133 | 'mammary cancer':ab,ti                                                                                                  | 3767    |
| #132 | 'mamma cancer':ab,ti                                                                                                    | 18      |
| #131 | 'cancer, breast':ab,ti                                                                                                  | 2639    |
| #130 | 'breast gland neoplasm':ab,ti                                                                                           | 0       |
| #129 | 'breast gland cancer':ab,ti                                                                                             | 0       |
| #128 | 'breast cancer recurrence':ab,ti                                                                                        | 2121    |
| #127 | 'advanced breast cancer':ab,ti                                                                                          | 11292   |
| #126 | 'breast cancer'/exp                                                                                                     | 408502  |
| #125 | #9 OR #26 OR #44 OR #58 OR #77 OR #88 OR #108 OR #124                                                                   | 37127   |
| #124 | #109 OR #110 OR #111 OR #112 OR #113 OR #114 OR #115 OR #116<br>OR #117 OR #118 OR #119 OR #120 OR #121 OR #122 OR #123 | 22992   |
| #123 | 'everolimus'/exp                                                                                                        | 22934   |
| #122 | 'zortress':ab,ti                                                                                                        | 5       |
| #121 | 'votubia':ab,ti                                                                                                         | 5       |
| #120 | 'sdz rad':ab,ti                                                                                                         | 67      |
| #119 | 'rad001a':ab,ti                                                                                                         | 0       |
| #118 | 'rad001':ab,ti                                                                                                          | 1041    |
| #117 | 'rad 001a':ab,ti                                                                                                        | 0       |
| #116 | 'rad 001':ab,ti                                                                                                         | 55      |
| #115 | 'nvp rad001':ab,ti                                                                                                      | 2       |

|      |                                                                                                                                                 |      |
|------|-------------------------------------------------------------------------------------------------------------------------------------------------|------|
| #114 | 'nvp rad 001':ab,ti                                                                                                                             | 0    |
| #113 | 'certican':ab,ti                                                                                                                                | 122  |
| #112 | 'afinitor disperz':ab,ti                                                                                                                        | 0    |
| #111 | 'afinitor':ab,ti                                                                                                                                | 104  |
| #110 | 'affinitor':ab,ti                                                                                                                               | 4    |
| #109 | '40 o (2 hydroxyethyl) rapamycin':ab,ti                                                                                                         | 28   |
| #108 | #89 OR #90 OR #91 OR #92 OR #93 OR #94 OR #95 OR #96 OR #97<br>OR #98 OR #99 OR #100 OR #101 OR #102 OR #103 OR #104 OR<br>#105 OR #106 OR #107 | 1919 |
| #107 | 'pf00080665-73':ab,ti                                                                                                                           | 0    |
| #106 | 'pf00080665 73':ab,ti                                                                                                                           | 0    |
| #105 | 'pf 00080665-73':ab,ti                                                                                                                          | 0    |
| #104 | 'pf 00080665 73':ab,ti                                                                                                                          | 0    |
| #103 | 'pd332991':ab,ti                                                                                                                                | 9    |
| #102 | 'pd0332991-0054':ab,ti                                                                                                                          | 0    |
| #101 | 'pd0332991 0054':ab,ti                                                                                                                          | 0    |
| #100 | 'pd0332991':ab,ti                                                                                                                               | 131  |
| #99  | 'pd 332991':ab,ti                                                                                                                               | 3    |
| #98  | 'pd 0332991-0054':ab,ti                                                                                                                         | 0    |
| #97  | 'pd 0332991 0054':ab,ti                                                                                                                         | 0    |
| #96  | 'pd 0332991':ab,ti                                                                                                                              | 206  |
| #95  | 'palbociclib isethionate':ab,ti                                                                                                                 | 0    |
| #94  | 'ibrance':ab,ti                                                                                                                                 | 29   |
| #93  | '6 acetyl 8 cyclopentyl 5 methyl 2 [[5 (piperazin 1 yl) pyridin 2 yl]<br>amino] pyrido [2, 3 d] pyrimidin 7 (8h) one':ab,ti                     | 1    |
| #92  | '6 acetyl 8 cyclopentyl 5 methyl 2 [[5 (1 piperazinyl) 2 pyridinyl] amino]<br>pyrido [2, 3 d] pyrimidin 7 (8h) one':ab,ti                       | 0    |
| #91  | '6 acetyl 8 cyclopentyl 5 methyl 2 [5 (piperazin 1 yl) pyridin 2 ylamino]<br>8h pyrido [2, 3 d] pyrimidin 7 one':ab,ti                          | 0    |
| #90  | '6 acetyl 8 cyclopentyl 5 methyl 2 [5 (1 piperazinyl) 2 pyridinylamino]<br>8h pyrido [2, 3 d] pyrimidin 7 one':ab,ti                            | 0    |
| #89  | 'palbociclib'/exp                                                                                                                               | 1910 |
| #88  | #78 OR #79 OR #80 OR #81 OR #82 OR #83 OR #84 OR #85 OR #86<br>OR #87                                                                           | 4098 |
| #87  | 'zd6474':ab,ti                                                                                                                                  | 240  |
| #86  | 'zd 6474':ab,ti                                                                                                                                 | 17   |
| #85  | 'zactima':ab,ti                                                                                                                                 | 57   |
| #84  | 'vandetinib':ab,ti                                                                                                                              | 22   |
| #83  | 'n (4 bromo 2 fluorophenyl) 6 methoxy 7 (1 methylpiperidin 4<br>ylmethoxy) quinazolin 4 amine':ab,ti                                            | 0    |

|     |                                                                                                                              |      |
|-----|------------------------------------------------------------------------------------------------------------------------------|------|
| #82 | 'n (4 bromo 2 fluorophenyl) 6 methoxy 7 (1 methyl 4 piperidinylmethoxy) 4 quinazolinamine':ab,ti                             | 0    |
| #81 | 'caprelsa':ab,ti                                                                                                             | 24   |
| #80 | 'azd6474':ab,ti                                                                                                              | 0    |
| #79 | 'azd 6474':ab,ti                                                                                                             | 0    |
| #78 | 'vandetanib'/exp                                                                                                             | 4073 |
| #77 | #59 OR #60 OR #61 OR #62 OR #63 OR #64 OR #65 OR #66 OR #67 OR #68 OR #69 OR #70 OR #71 OR #72 OR #73 OR #74 OR #75 OR #76   | 545  |
| #76 | 'ribociclib succinate':ab,ti                                                                                                 | 0    |
| #75 | 'ribociclib butanedioate':ab,ti                                                                                              | 0    |
| #74 | 'lee11bba':ab,ti                                                                                                             | 0    |
| #73 | 'lee11a':ab,ti                                                                                                               | 0    |
| #72 | 'lee11':ab,ti                                                                                                                | 0    |
| #71 | 'lee011bba':ab,ti                                                                                                            | 0    |
| #70 | 'lee011a':ab,ti                                                                                                              | 0    |
| #69 | 'lee011':ab,ti                                                                                                               | 111  |
| #68 | 'lee 11bba':ab,ti                                                                                                            | 0    |
| #67 | 'lee 11a':ab,ti                                                                                                              | 0    |
| #66 | 'lee 11':ab,ti                                                                                                               | 1    |
| #65 | 'lee 011bba':ab,ti                                                                                                           | 0    |
| #64 | 'lee 011a':ab,ti                                                                                                             | 0    |
| #63 | 'lee 011':ab,ti                                                                                                              | 2    |
| #62 | 'kisqali':ab,ti                                                                                                              | 8    |
| #61 | '7 cyclopentyl n, n dimethyl 2 [[5 (piperazin 1 yl) pyridin 2 yl] amino] 7h pyrrolo [2, 3 d] pyrimidine 6 carboxamide':ab,ti | 0    |
| #60 | '7 cyclopentyl n, n dimethyl 2 [[5 (1 piperazinyl) 2 pyridinyl] amino] 7h pyrrolo [2, 3 d] pyrimidine 6 carboxamide':ab,ti   | 0    |
| #59 | 'ribociclib'/exp                                                                                                             | 528  |
| #58 | #45 OR #46 OR #47 OR #48 OR #49 OR #50 OR #51 OR #52 OR #53 OR #54 OR #55 OR #56 OR #57                                      | 8204 |
| #57 | 'zm182780':ab,ti                                                                                                             | 0    |
| #56 | 'zm 182780':ab,ti                                                                                                            | 18   |
| #55 | 'zd9238':ab,ti                                                                                                               | 0    |
| #54 | 'zd182780':ab,ti                                                                                                             | 0    |
| #53 | 'zd 9238':ab,ti                                                                                                              | 0    |
| #52 | 'zd 182780':ab,ti                                                                                                            | 0    |
| #51 | 'ici182780':ab,ti                                                                                                            | 236  |
| #50 | 'ici 182780':ab,ti                                                                                                           | 530  |
| #49 | 'ici 182, 780':ab,ti                                                                                                         | 2274 |
| #48 | 'ici 182 780':ab,ti                                                                                                          | 2274 |
| #47 | 'faslodex':ab,ti                                                                                                             | 307  |

---

|     |                                                                                                              |      |
|-----|--------------------------------------------------------------------------------------------------------------|------|
| #46 | '7alpha [9 (4, 4, 5, 5, 5 pentafluoropentylsulfinyl) nonyl] estra 1, 3, 5 (10) triene 3, 17beta diol':ab,ti  | 0    |
| #45 | 'fulvestrant'/exp                                                                                            | 7511 |
| #44 | #36 OR #37 OR #38 OR #39 OR #40 OR #41 OR #42 OR #43                                                         | 904  |
| #43 | 'tki258':ab,ti                                                                                               | 116  |
| #42 | 'tki 258':ab,ti                                                                                              | 26   |
| #41 | 'dovitinib lactate':ab,ti                                                                                    | 5    |
| #40 | 'chir258':ab,ti                                                                                              | 8    |
| #39 | 'chir 258':ab,ti                                                                                             | 15   |
| #38 | '4 amino 5 fluoro 3 [6 (4 methylpiperazin 1 yl) 1h benzimidazol 2 yl] quinolin 2 (1h) one':ab,ti             | 0    |
| #37 | '4 amino 5 fluoro 3 [6 (4 methyl 1 piperazinyl) 1h benzimidazol 2 yl] 2 (1h) quinolinone':ab,ti              | 0    |
| #36 | 'dovitinib'/exp                                                                                              | 888  |
| #35 | #27 OR #28 OR #29 OR #30 OR #31 OR #32 OR #33 OR #34                                                         | 904  |
| #34 | 'tki258':ab,ti                                                                                               | 116  |
| #33 | 'tki 258':ab,ti                                                                                              | 26   |
| #32 | 'dovitinib lactate':ab,ti                                                                                    | 5    |
| #31 | 'chir258':ab,ti                                                                                              | 8    |
| #30 | 'chir 258':ab,ti                                                                                             | 15   |
| #29 | '4 amino 5 fluoro 3 [6 (4 methylpiperazin 1 yl) 1h benzimidazol 2 yl] quinolin 2 (1h) one':ab,ti             | 0    |
| #28 | '4 amino 5 fluoro 3 [6 (4 methyl 1 piperazinyl) 1h benzimidazol 2 yl] 2 (1h) quinolinone':ab,ti              | 0    |
| #27 | 'dovitinib'/exp                                                                                              | 888  |
| #26 | #10 OR #11 OR #12 OR #13 OR #14 OR #15 OR #16 OR #17 OR #18 OR #19 OR #20 OR #21 OR #22 OR #23 OR #24 OR #25 | 1413 |
| #25 | 'nvp bkm120':ab,ti                                                                                           | 106  |
| #24 | 'nvp bkm 120':ab,ti                                                                                          | 9    |
| #23 | 'buparlisib hydrochloride':ab,ti                                                                             | 0    |
| #22 | 'bkm120nx':ab,ti                                                                                             | 0    |
| #21 | 'bkm120aaa':ab,ti                                                                                            | 0    |
| #20 | 'bkm120 nx':ab,ti                                                                                            | 0    |
| #19 | 'bkm120 aaa':ab,ti                                                                                           | 0    |
| #18 | 'bkm120':ab,ti                                                                                               | 528  |
| #17 | 'bkm 120nx':ab,ti                                                                                            | 0    |
| #16 | 'bkm 120aaa':ab,ti                                                                                           | 0    |
| #15 | 'bkm 120 nx':ab,ti                                                                                           | 0    |
| #14 | 'bkm 120 aaa':ab,ti                                                                                          | 0    |
| #13 | 'bkm 120':ab,ti                                                                                              | 63   |
| #12 | '5 [2, 6 bis (morpholin 4 yl) pyrimidin 4 yl] 4 (trifluoromethyl) pyridin 2 amine':ab,ti                     | 0    |

---



|     |                                                                                                                                                     |      |
|-----|-----------------------------------------------------------------------------------------------------------------------------------------------------|------|
| #11 | '5 (2, 6 dimorpholino 4 pyrimidinyl) 4 (trifluoromethyl) 2 pyridinamine':ab,ti                                                                      | 0    |
| #10 | 'buparlisib'/exp                                                                                                                                    | 1358 |
| #9  | #1 OR #2 OR #3 OR #4 OR #5 OR #6 OR #7 OR #8                                                                                                        | 415  |
| #8  | 'n [5 [(4 ethylpiperazin 1 yl) methyl] pyridin 2 yl] 5 fluoro 4 [4 fluoro 2 methyl 1 (propan 2 yl) 1h benzimidazol 6 yl] pyrimidin 2 amine':ab,ti   | 0    |
| #7  | 'n [5 [(4 ethylpiperazin 1 yl) methyl] pyridin 2 yl] 5 fluoro 4 [4 fluoro 2 methyl 1 (1 methylethyl) 1h benzimidazol 6 yl] pyrimidin 2 amine':ab,ti | 0    |
| #6  | 'n [5 [(4 ethyl 1 piperazinyl) methyl] 2 pyridinyl] 5 fluoro 4 [4 fluoro 2 methyl 1 (1 methylethyl) 1h benzimidazol 6 yl] 2 pyrimidinamine':ab,ti   | 0    |
| #5  | 'n [5 [(4 ethyl 1 piperazinyl) methyl] 2 pyridinyl] 5 fluoro 4 (4 fluoro 1 isopropyl 2 methyl 1h benzimidazol 6 yl) 2 pyrimidinamine':ab,ti         | 0    |
| #4  | 'ly2835219':ab,ti                                                                                                                                   | 56   |
| #3  | 'ly 2835219':ab,ti                                                                                                                                  | 0    |
| #2  | 'bemaciclib':ab,ti                                                                                                                                  | 0    |
| #1  | 'abemaciclib'/exp                                                                                                                                   | 407  |

---

Source: Cochrane Library (Searched on: 5 June 2018)

---

| No. | Query                                                                                                                                  |
|-----|----------------------------------------------------------------------------------------------------------------------------------------|
| #1  | abemaciclib:ti,ab,kw (Word variations have been searched)                                                                              |
| #2  | LY2835210:ti,ab,kw (Word variations have been searched)                                                                                |
| #3  | LY2385219:ti,ab,kw (Word variations have been searched)                                                                                |
| #4  | #1 or #2 or #3                                                                                                                         |
| #5  | "NVP-BKM120":ti,ab,kw (Word variations have been searched)                                                                             |
| #6  | buparlisib:ti,ab,kw (Word variations have been searched)                                                                               |
| #7  | BKM120:ti,ab,kw (Word variations have been searched)                                                                                   |
| #8  | #5 or #6 or #7                                                                                                                         |
| #9  | "4-amino-5-fluoro-3-(5-(4-methylpiperazin-1-yl)-1H-benzimidazol-2-yl)quinolin-2(1H)-one":ti,ab,kw (Word variations have been searched) |
| #10 | "TKI 258":ti,ab,kw (Word variations have been searched)                                                                                |
| #11 | TKI258:ti,ab,kw (Word variations have been searched)                                                                                   |
| #12 | "TKI-258":ti,ab,kw (Word variations have been searched)                                                                                |
| #13 | dovitinib:ti,ab,kw (Word variations have been searched)                                                                                |
| #14 | "CHIR 258":ti,ab,kw (Word variations have been searched)                                                                               |
| #15 | CHIR258:ti,ab,kw (Word variations have been searched)                                                                                  |
| #16 | "CHIR-258":ti,ab,kw (Word variations have been searched)                                                                               |
| #17 | #9 or #10 or #11 or #12 or #13 or #14 or #15 or #16                                                                                    |
| #18 | MeSH descriptor: [Everolimus] explode all trees                                                                                        |
| #19 | "SDZ RAD":ti,ab,kw (Word variations have been searched)                                                                                |
| #20 | "RAD, SDZ":ti,ab,kw (Word variations have been searched)                                                                               |
| #21 | "SDZ-RAD":ti,ab,kw (Word variations have been searched)                                                                                |
| #22 | "40-O-(2-hydroxyethyl)-rapamycin":ti,ab,kw (Word variations have been searched)                                                        |
| #23 | "RAD 001":ti,ab,kw (Word variations have been searched)                                                                                |
| #24 | "001, RAD":ti,ab,kw (Word variations have been searched)                                                                               |
| #25 | "RAD001":ti,ab,kw (Word variations have been searched)                                                                                 |
| #26 | "Afinitor":ti,ab,kw (Word variations have been searched)                                                                               |
| #27 | "Certican":ti,ab,kw (Word variations have been searched)                                                                               |
| #28 | #18 or #19 or #20 or #21 or #22 or #23 or #24 or #25 or #26 or #27                                                                     |

---

- 
- #29 ribociclib:ti,ab,kw (Word variations have been searched)
- #30 LEE011:ti,ab,kw (Word variations have been searched)
- #31 #29 or #30
- #32 "N-(4-bromo-2-fluorophenyl)-6-methoxy-7-((1-methylpiperidin-4-yl)methoxy)quinazolin-4-amine":ti,ab,kw (Word variations have been searched)
- #33 caprelsa:ti,ab,kw (Word variations have been searched)
- #34 "ZD 6474":ti,ab,kw (Word variations have been searched)
- #35 ZD6474:ti,ab,kw (Word variations have been searched)
- #36 "ZD-6474":ti,ab,kw (Word variations have been searched)
- #37 "vandetanib":ti,ab,kw (Word variations have been searched)
- #38 "Zactima":ti,ab,kw (Word variations have been searched)
- #39 #32 or #33 or #34 or #35 or #36 or #37 or #38
- #40 fulvestrant:ti,ab,kw (Word variations have been searched)
- #41 "7-(9-(4,4,5,5,5-pentafluoropentylsulfinyl)nonyl)estra-1,3,5(10)-triene-3,17-diol":ti,ab,kw (Word variations have been searched)
- #42 "ICI 182780":ti,ab,kw (Word variations have been searched)
- #43 "ICI 182,780":ti,ab,kw (Word variations have been searched)
- #44 "ICI-182780":ti,ab,kw (Word variations have been searched)
- #45 "ZM 182780":ti,ab,kw (Word variations have been searched)
- #46 "ZM-182780":ti,ab,kw (Word variations have been searched)
- #47 "Faslodex":ti,ab,kw (Word variations have been searched)
- #48 #40 or #41 or #42 or #43 or #44 or #45 or #46 or #47
- #49 palbociclib:ti,ab,kw (Word variations have been searched)
- #50 "6-acetyl-8-cyclopentyl-5-methyl-2-(5-piperazin-1-ylpyridin-2-ylamino)-8H-pyrido(2,3-d)pyrimidin-7-one":ti,ab,kw (Word variations have been searched)
- #51 "Ibrance":ti,ab,kw (Word variations have been searched)
- #52 "PD 0332991":ti,ab,kw (Word variations have been searched)
- #53 "PD0332991":ti,ab,kw (Word variations have been searched)
- #54 "PD-0332991":ti,ab,kw (Word variations have been searched)
- #55 #49 or #50 or #51 or #52 or #53 or #54
- #56 #4 or #8 or #17 or #28 or #31 or #39 or #48 or #55
- #57 MeSH descriptor: [Breast Neoplasms] explode all trees
-

- 
- #58 "Tumors, Breast":ti,ab,kw (Word variations have been searched)
- #59 "Breast Tumors":ti,ab,kw (Word variations have been searched)
- #60 "Breast Tumor":ti,ab,kw (Word variations have been searched)
- #61 "Tumor, Breast":ti,ab,kw (Word variations have been searched)
- #62 "Neoplasms, Breast":ti,ab,kw (Word variations have been searched)
- #63 "Breast Neoplasm":ti,ab,kw (Word variations have been searched)
- #64 "Neoplasm, Breast":ti,ab,kw (Word variations have been searched)
- #65 "Breast Cancer":ti,ab,kw (Word variations have been searched)
- #66 "Cancer, Breast":ti,ab,kw (Word variations have been searched)
- #67 "Cancer of the Breast":ti,ab,kw (Word variations have been searched)
- #68 "Mammary Cancer":ti,ab,kw (Word variations have been searched)
- #69 "Cancer, Mammary":ti,ab,kw (Word variations have been searched)
- #70 "Cancers, Mammary":ti,ab,kw (Word variations have been searched)
- #71 "Mammary Cancers":ti,ab,kw (Word variations have been searched)
- #72 "Malignant Neoplasm of Breast":ti,ab,kw (Word variations have been searched)
- #73 "Breast Malignant Neoplasm":ti,ab,kw (Word variations have been searched)
- #74 "Breast Malignant Neoplasms":ti,ab,kw (Word variations have been searched)
- #75 "Malignant Tumor of Breast":ti,ab,kw (Word variations have been searched)
- #76 "Breast Malignant Tumor":ti,ab,kw (Word variations have been searched)
- #77 "Breast Malignant Tumors":ti,ab,kw (Word variations have been searched)
- #78 "Cancer of Breast":ti,ab,kw (Word variations have been searched)
- #79 "Breast Carcinoma":ti,ab,kw (Word variations have been searched)
- #80 "Breast Carcinomas":ti,ab,kw (Word variations have been searched)
- #81 "Carcinoma, Breast":ti,ab,kw (Word variations have been searched)
- #82 "Carcinomas, Breast":ti,ab,kw (Word variations have been searched)
- #83 "Mammary Carcinoma, Human":ti,ab,kw (Word variations have been searched)
- #84 "Carcinoma, Human Mammary":ti,ab,kw (Word variations have been searched)
- #85 "Carcinomas, Human Mammary":ti,ab,kw (Word variations have been searched)
- #86 "Human Mammary Carcinomas":ti,ab,kw (Word variations have been searched)
- #87 "Mammary Carcinomas, Human":ti,ab,kw (Word variations have been searched)
-

- 
- #88 "Human Mammary Carcinoma":ti,ab,kw (Word variations have been searched)
- #89 "Mammary Neoplasms, Human":ti,ab,kw (Word variations have been searched)
- #90 "Human Mammary Neoplasm":ti,ab,kw (Word variations have been searched)
- #91 "Human Mammary Neoplasms":ti,ab,kw (Word variations have been searched)
- #92 "Neoplasm, Human Mammary":ti,ab,kw (Word variations have been searched)
- #93 "Neoplasms, Human Mammary":ti,ab,kw (Word variations have been searched)
- #94 "Mammary Neoplasm, Human":ti,ab,kw (Word variations have been searched)
- #57 or #58 or #59 or #60 or #61 or #62 or #63 or #64 or #65 or #66 or #67 or #68 or #69 or #70
- #95 or #71 or #72 or #73 or #74 or #75 or #76 or #77 or #78 or #79 or #80 or #81 or #82 or #83 or #84 or #85 or #86 or #87 or #88 or #89 or #90 or #91 or #92 or #93 or #94
- #96 #56 and #95
-

| ID | study       | clinicaltrials.gov | author            | year |
|----|-------------|--------------------|-------------------|------|
| 1  | MONARCH2    | NCT02107703        | George W. Sledge  | 2017 |
| 2  | ---         | NCT01528345        | Antonino Musolino | 2017 |
| 3  | PrECOG 0102 | ---                | NS Kornblum       | 2018 |
| 4  | BELLE-2     | NCT01610284        | José Baselga      | 2017 |

|   |       |             |            |      |
|---|-------|-------------|------------|------|
| 5 | FERGI | NCT01437566 | Ian E Krop | 2016 |
|---|-------|-------------|------------|------|

|   |          |             |                       |      |
|---|----------|-------------|-----------------------|------|
| 6 | PALOMA-3 | NCT01942135 | Massimo Cristofanilli | 2016 |
|---|----------|-------------|-----------------------|------|

|   |                                       |             |               |      |
|---|---------------------------------------|-------------|---------------|------|
| 7 | a New York<br>Cancer Consortium trial | NCT01142401 | Kerin Adelson | 2016 |
|---|---------------------------------------|-------------|---------------|------|

|   |                         |             |                 |      |
|---|-------------------------|-------------|-----------------|------|
| 8 | the OCOG ZAMBONEY study | NCT00811369 | Mark J. Clemons | 2014 |
|---|-------------------------|-------------|-----------------|------|

|   |         |             |               |      |
|---|---------|-------------|---------------|------|
| 9 | BELLE-3 | NCT01633060 | Angelo Di Leo | 2017 |
|---|---------|-------------|---------------|------|

|    |             |             |                  |      |
|----|-------------|-------------|------------------|------|
| 10 | MONALEESA-3 | NCT02422615 | Dennis J. Slamon | 2018 |
|----|-------------|-------------|------------------|------|

|    |            |             |               |      |
|----|------------|-------------|---------------|------|
| 11 | SAKK 21/08 | NCT01160718 | Khalil Zamana | 2015 |
|----|------------|-------------|---------------|------|



| journal                      | foundation                                                                                                                                                   | study design                                                                                       |
|------------------------------|--------------------------------------------------------------------------------------------------------------------------------------------------------------|----------------------------------------------------------------------------------------------------|
| Journal of Clinical Oncology | Chugai Pharma (Inst),<br>AstraZeneca (Inst),<br>Kyowa-<br>Kirin (Inst), MSD<br>Oncology (Inst),<br>Novartis (Inst),<br>Pfizer (Inst), Eli<br>Lilly<br>(Inst) | phase III, randomized,<br>double-blind,<br>placebo-controlled study                                |
| Breast Cancer Research       | Novartis<br>Pharmaceuticals<br>(Basel,<br>Switzerland).                                                                                                      | phase II, multicenter,<br>international, randomized,<br>double-blind, placebo-<br>controlled trial |
| JOURNAL OF CLINICAL ONCOLOGY | ---                                                                                                                                                          | randomized, double-blind,<br>placebo-controlled phase<br>II<br>trial.                              |
| Lancet Oncology              | Novartis                                                                                                                                                     | randomised, double-blind,<br>placebo-controlled, phase<br>3 trial                                  |

Lancet Oncology

F Hoff mann-La Roche.

international,  
multicentre, randomised,  
double-blind, placebo-  
controlled, phase 2  
clinical trial

Lancet Oncology

Pfizer

prospective, randomised,  
double-blind,  
placebo-controlled phase 3  
trial done

Nature partner  
journals(Breast Cancer)

---

open-label, multicenter,  
randomized phase II trial

Breast Cancer Research and  
Treatment

---

a randomised, double-  
blind, multicentre,  
phase II study

Lancet Oncology

Novartis  
Pharmaceuticals  
Corporation

randomised, double-blind,  
placebo-controlled, phase  
3 trial

JOURNAL OF CLINICAL ONCOLOGY

Supported by Novartis  
Pharmaceuticals,  
which also funded  
medical writing  
assistance.

phase III, double-blind,  
placebo-controlled  
international  
study

European Journal of Cancer

AstraZeneca AG  
Switzerland,  
S.A. AstraZeneca N.V.  
and the Swiss  
State Secretariat

multicentre, double-blind,  
placebo-controlled  
and randomised phase II  
trial

| randomization                                                                                    | country                     | M   | Simple size |
|--------------------------------------------------------------------------------------------------|-----------------------------|-----|-------------|
| Using an interactive, web-based randomization scheme,                                            | 142 centers in 19 countries | 379 | 669         |
| a patient number, which was used as the primary identifier for the patient throughout the study. | ---                         | 64  | 97          |
| Random assignment was conducted centrally using permuted blocks within strata.                   | ---                         | 98  | 131         |
| Patients were assigned randomisation numbers with a validated interactive response technology    | 267centers in 29 countries  | 784 | 1147        |

|                                                                                                                                                                                                              |                                             |            |            |
|--------------------------------------------------------------------------------------------------------------------------------------------------------------------------------------------------------------|---------------------------------------------|------------|------------|
| <p>a computer-generated hierarchical randomisation algorithm</p>                                                                                                                                             | <p>123 medical centres across countries</p> | <p>120</p> | <p>168</p> |
| <p>the investigator or another designated member of the research staff via a centralised interactive web-based and voice-based randomisation system(which also generated the random allocation sequence)</p> | <p>in 144 centres in 17 countries</p>       | <p>259</p> | <p>521</p> |
| <p>---</p>                                                                                                                                                                                                   | <p>---</p>                                  | <p>---</p> | <p>116</p> |
| <p>A computer-generated randomization schedule was used to allocate patients using variable block sizes</p>                                                                                                  | <p>13 Canadian cancer centres</p>           | <p>---</p> | <p>129</p> |

|                                                                                                                                                              |                                          |            |            |
|--------------------------------------------------------------------------------------------------------------------------------------------------------------|------------------------------------------|------------|------------|
| <p>Randomisation was done with a block size of six within each stratum. Patients and investigators (including local radiologists) remained <b>masked</b></p> | <p>200 trial centres in 22 countries</p> | <p>319</p> | <p>432</p> |
|                                                                                                                                                              |                                          | <p>361</p> | <p>726</p> |
| <p>Randomisation was stratified using the minimisation method for centre</p>                                                                                 | <p>—</p>                                 | <p>15</p>  | <p>42</p>  |

| sex(women%) | Her-2 expression | disease stage                                                                                                                 | pathway inhibited |
|-------------|------------------|-------------------------------------------------------------------------------------------------------------------------------|-------------------|
| 100%        | (-)              | ABC                                                                                                                           | CDK4/6            |
| 100%        | (-)              | locally advanced or metastatic breast cancer                                                                                  | FGFR              |
| 100%        | (-)              | unresectable locally advanced or metastatic, ER-positive, human epidermal growth factor receptor 2/neu negative breast cancer | mTOR              |
| 100%        | (-)              | inoperable locally advanced or metastatic disease                                                                             | PI3K              |

100% (-) locally advanced or metastatic breast cancer PI3K-AKT-mTOR

100% (-) metastatic breast cancer CDK4/6

100% (-) unresectable locally advanced or metastatic breast cancer proteasome inhibitor

Primary tumour status: n (%) 3 (5)  
VS 3 (5)

100% Metastatic tumour status: n (%) 3 (5) vs 1 (2) metastatic breast cancer VEGF



|                  |                  |                                                                                                                                                     |                         |
|------------------|------------------|-----------------------------------------------------------------------------------------------------------------------------------------------------|-------------------------|
| 100%             | 100%             | locally advanced or metastatic breast cancer pretreated with aromatase inhibitors and resistant to endocrine and mTOR inhibitor combination therapy | PI3K                    |
| female:484, 100% | female:242, 100% | advanced (metastatic or locoregionally recurrent disease not amenable to curative treatment) breast cancer.                                         | CDK4/6                  |
| 100%             | (-)              | advanced-stage endocrine sensitive (ER and/or PgR $\geq 10\%$ ) breast cancer                                                                       | MEK 1/2inhibitor (MAPK) |

| trt1                                                  | trt2                          | event | simple |     |
|-------------------------------------------------------|-------------------------------|-------|--------|-----|
| abemaciclib 200 mg twice daily+ fulvestrant 500mg, im | placebo+fulvestrant 500mg, im | 222   | 157    | 446 |
| dovitinib 500 mg +fulvestrant 500 mg, im              | placebo+fulvestrant 500mg, im | 30    | 34     | 47  |
| everolimus 10mg+fulvestrant 500mg, im                 | placebo+fulvestrant 500mg, im | ---   | ---    | 66  |
| buparlisib 100 mg once daily, +fulvestrant 500 mg, im | placebo+fulvestrant 500mg, im | 349   | 435    | 576 |

pictilisib 340 mg daily+  
fulvestrant 500 mg, im

placebo+fulvestrant 500mg,  
im

61

59

89

palbociclib 125 mg  
daily+fulvestrant 500 mg, im

placebo+fulvestrant 500mg,  
im

145

114

347

bortezomib+fulvestrant 500 mg  
, i. m

fulvestrant 500mg, im

---

---

57

vandetanib 100 mg, PO  
OD+fulvestrant 500 mg , im

placebo+fulvestrant 500mg,  
im

---

---

61

|                                                       |                               |     |     |     |
|-------------------------------------------------------|-------------------------------|-----|-----|-----|
| buparlisib 100 mg once daily, +fulvestrant 500 mg, im | placebo+fulvestrant 500mg, im | 202 | 117 | 289 |
|-------------------------------------------------------|-------------------------------|-----|-----|-----|

|                                                                                                            |                               |     |     |     |
|------------------------------------------------------------------------------------------------------------|-------------------------------|-----|-----|-----|
| ribociclib 600mg orally per day, 3 weeks on, 1 week off+fulvestrant 500mgim, on day 1 of each 28-day cycle | placebo+fulvestrant 500mg, im | 210 | 151 | 484 |
|------------------------------------------------------------------------------------------------------------|-------------------------------|-----|-----|-----|

|                                 |                               |   |    |    |
|---------------------------------|-------------------------------|---|----|----|
| selumetinib 75 mg + Fulvestrant | placebo+fulvestrant 500mg, im | 5 | 10 | 22 |
|---------------------------------|-------------------------------|---|----|----|

| size | median age (years) |                  | Prior endocr                                                                          |
|------|--------------------|------------------|---------------------------------------------------------------------------------------|
| 223  | 59 (32-91)         | 62 (32-87)       | AI:316 (70.9%)                                                                        |
| 50   | 63 (44 - 82)       | 63 (38 - 82)     | Tam:27 (57.4%)<br>Let:18 (38.3%)<br>Ana:16 (34.0%)<br>Exe:8 (17.0%)<br>Other:1 (2.1%) |
| 65   | 64 (39-92)         | 59 (35-85)       | AI-resistant                                                                          |
| 571  | 62.0 (55.0 - 69.0) | 61 (54.0 - 68.0) | AI:574 (100%)                                                                         |

|     |                                                   |                                                   |                                                                                                                                                             |
|-----|---------------------------------------------------|---------------------------------------------------|-------------------------------------------------------------------------------------------------------------------------------------------------------------|
| 79  | 60 (36 - 90)<br>Aged $\geq$ 65 years:<br>29 (33%) | 63 (40 - 82)<br>Aged $\geq$ 65 years: 29<br>(37%) | AI: (98%)                                                                                                                                                   |
| 174 | 57 (30 - 88)                                      | 56 (29 - 80)                                      | AI:137 (39%)<br>Tam:51 (15%)<br>AI+Tam:159 (46%)                                                                                                            |
| 59  | 59 (31 - 80)                                      | 57 (31 - 83)                                      | Endocrine therapy<br>: 42 (74%)<br>Mean no. of prior:<br>1.47<br>endocrine<br>therapies for<br>advanced disease                                             |
| 68  | 61.6 (SD: 8.9)                                    | 57.7 (SD: 8.7)                                    | Tam or AI for<br>metastatic<br>disease: 42 (69%)<br><br>Tamoxifen or AI in<br>adjuvant: 9 (15%)<br><br>Any prior adjuvant<br>endocrine<br>therapy: 10 (16%) |

|     |                    |                    |                                                                                                                                |
|-----|--------------------|--------------------|--------------------------------------------------------------------------------------------------------------------------------|
| 143 | 60.0 (54.0 - 68.0) | 62.0 (55.0 - 69.0) | Lines of previous hormonal therapy in metastatic setting:<br>1:87 (30%)<br>2:166 (57%)<br>3:31 (11%)<br>4:4 (1%)<br>≥5:1 (<1%) |
| 242 | 63.0 (31 - 89)     | 63.0 (34 - 86)     | Tamoxifen: 41%<br>AI: 53%                                                                                                      |
| 20  | 66 (40 - 79)       | 69 (46 - 79)       | AI: Adjuvant 9 (41%)<br>Advanced stage 13 (59%)<br>Tam: 14 (64%)                                                               |

| line therapy (%)                                                                      | HR status (%)                         |                                       |
|---------------------------------------------------------------------------------------|---------------------------------------|---------------------------------------|
| AI:149 (66.8%)                                                                        | PR(+):339 (76.0%)<br>PR(-):96 (21.5%) | PR(+):171 (76.7%)<br>PR(-):44 (19.7%) |
| Tam:21 (42.0%)<br>Let:23 (46.0%)<br>Ana:18 (36.0%)<br>Exe:9 (18.0%)<br>Other:4 (8.0%) | HR+:100%                              | HR+:100%                              |
| AI-resistant                                                                          | HR+:100%                              | HR+:100%                              |
| AI:568 (99%)                                                                          | (+)                                   | (+)                                   |



|                                                                                                                                                                                     |                                                                                                                                                                                                                  |                                                                                                                                                                                                                 |
|-------------------------------------------------------------------------------------------------------------------------------------------------------------------------------------|------------------------------------------------------------------------------------------------------------------------------------------------------------------------------------------------------------------|-----------------------------------------------------------------------------------------------------------------------------------------------------------------------------------------------------------------|
| <p>AI: (99%)</p>                                                                                                                                                                    | <p>ER (+)<br/>PR (+) 58 (65%)<br/>PR (-) 21 (24%)<br/>PR (unknown) 10 (11%)</p>                                                                                                                                  | <p>ER (+)<br/>PR (+) 58 (73%)<br/>PR (-) 14 (18%)<br/>PR (unknown) 7 (9%)</p>                                                                                                                                   |
| <p>AI:70 (40%)<br/>Tam:23 (13%)<br/>AI+Tam:81 (47%)</p>                                                                                                                             | <p>ER, PR(+):<br/>≥Median of<br/>distribution: 81 (23%)<br/>&lt;Median of<br/>distribution: 71 (20%)<br/>ER/PR (+):<br/>≥Median of<br/>distribution: 179 (52%)<br/>&lt;Median of<br/>distribution: 165 (48%)</p> | <p>ER, PR(+):<br/>≥Median of<br/>distribution: 40 (23%)<br/>&lt;Median of<br/>distribution: 29 (17%)<br/>ER/PR (+):<br/>≥Median of<br/>distribution: 100 (57%)<br/>&lt;Median of<br/>distribution: 90 (52%)</p> |
| <p>Endocrine therapy :<br/>39 (66%)</p> <p>Mean no. of prior:<br/>1.43<br/>endocrine<br/>therapies for<br/>advanced disease</p> <p>ER (+) 100%                      ER (+) 100%</p> |                                                                                                                                                                                                                  |                                                                                                                                                                                                                 |
| <p>Tam or AI for<br/>metastatic<br/>disease: 53 (78%)</p> <p>Tamoxifen or AI in<br/>adjuvant: 10 (15%)</p> <p>Any prior adjuvant<br/>endocrine<br/>therapy: 5 (7%)</p>              | <p>Primary tumour<br/>status: ER(+)56 (92%)<br/>PR(+)47 (77%)</p> <p>Metastatic tumour<br/>status: n (%)<br/>ER(+)19 (31%)<br/>PR(+)11 (18%)</p>                                                                 | <p>Primary tumour<br/>status: ER(+)64 (94%)<br/>PR(+)47 (69%)</p> <p>Metastatic tumour<br/>status: n (%)<br/>ER(+)17 (25%)<br/>PR(+)7 (10%)</p>                                                                 |

Lines of previous hormonal therapy in metastatic setting:

1:48 (34%)  
2:48 (34%)  
3:16 (11%)  
4:3 (2%)  
≥5:0

|                |                 |                 |
|----------------|-----------------|-----------------|
| Tamoxifen: 61% | ER+:481 (99.4%) | ER+:241 (99.6%) |
| AI:68%         | PR+:353 (72.9%) | PR+:167 (69.0%) |

|                                                                    |                       |                       |
|--------------------------------------------------------------------|-----------------------|-----------------------|
| AI: Adjuvant 8<br>(40%) Advanced stage<br>12 (60%)<br>Tam:11 (55%) | (ER and/or PgR ≥ 10%) | (ER and/or PgR ≥ 10%) |
|--------------------------------------------------------------------|-----------------------|-----------------------|

| Metastatic site                                                                                                      |                                                                                                                            | Visceral disease |             | Measurabl                         |
|----------------------------------------------------------------------------------------------------------------------|----------------------------------------------------------------------------------------------------------------------------|------------------|-------------|-----------------------------------|
| Bone only:123<br>(27.6%)<br>Other:75 (16.8%)                                                                         | Bone only:57<br>(25.6%)<br>Other:38 (17.0%)                                                                                | 245 (54.9%)      | 128 (57.4%) | yes:318 (71.3%)<br>no:128 (28.7%) |
| Bone 39 (83.0%)<br>Lymph nodes 21<br>(44.7%)<br>Liver 22 (46.8%)<br>Other 19 (40.4%)<br>Adrenal 3 (6.4%)<br>Breast 0 | Bone 36 (72.0%)<br>Lymph nodes 26<br>(52.0%)<br>Liver 16 (32.0%)<br>Other 8 (16.0%)<br>Adrenal 3 (6.0%)<br>Breast 1 (2.0%) | 35 (74.5%)       | 30 (60.0%)  | ---                               |
| Bone:44 (67%)<br>Lung:28(42%)<br>Liver:18 (27%)<br>Lymph nodes:27<br>(41%)                                           | Bone:46 (71%)<br>Lung:23(35%)<br>Liver:17 (26%)<br>Lymph nodes:28<br>(43%)                                                 | ---              | ---         | 44, 67%                           |
| ---                                                                                                                  | ---                                                                                                                        | 341 (59%)        | 337 (59%)   | ---                               |

|                                  |                                  |          |          |          |
|----------------------------------|----------------------------------|----------|----------|----------|
| Bone-only disease:<br>19 (21%)   | Bone-only disease:<br>17 (22%)   |          |          |          |
| ≥3 metastatic sites:<br>24 (27%) | ≥3 metastatic sites:<br>31 (39%) | 51 (57%) | 42 (53%) | 51 (57%) |

|                                               |                                               |           |           |                                   |
|-----------------------------------------------|-----------------------------------------------|-----------|-----------|-----------------------------------|
| Lung involvement:<br>100 (29%)                | Lung involvement:<br>45 (26%)                 |           |           |                                   |
| Liver involvement: 127 (37%)                  | Liver involvement: 81 (47%)                   | 206 (59%) | 105 (60%) | Any measurable disease: 268 (77%) |
| Peritoneal involvement: 2 (1%)                | Peritoneal involvement: 1 (1%)                |           |           |                                   |
| Brain or pleural involvement, or both: 4 (1%) | Brain or pleural involvement, or both: 4 (1%) |           |           |                                   |

|                |                |     |     |              |
|----------------|----------------|-----|-----|--------------|
| Bone:46 (78%)  | Bone:45 (76%)  |     |     |              |
| Lung:9 (15%)   | Lung:23 (39%)  | --- | --- | yes:31 (54%) |
| Liver:22 (37%) | Liver:21 (36%) |     |     | no:26 (46%)  |
| Pleura:5 (8%)  | Pleura:8 (14%) |     |     |              |

|                      |                     |     |     |            |
|----------------------|---------------------|-----|-----|------------|
| Liver: 14 (23%)      |                     |     |     |            |
| Lung:12 (20%)        |                     |     |     |            |
| Lymph node: 14 (23%) |                     |     |     |            |
| 16 (24%)             |                     |     |     |            |
| Skin: 3 (5%)         | Liver:23 (34%)      |     |     |            |
| Other: 15 (25%)      | Lung: 22 (32%)      |     |     |            |
|                      | Lymph node:16 (24%) | --- | --- | 21 (34.4%) |
|                      | Skin:0 (0%)         |     |     |            |
|                      | Other:18 (27%)      |     |     |            |

|                                                                                                                                                                                                         |                                                                                                                                                                                                      |                          |                          |          |
|---------------------------------------------------------------------------------------------------------------------------------------------------------------------------------------------------------|------------------------------------------------------------------------------------------------------------------------------------------------------------------------------------------------------|--------------------------|--------------------------|----------|
| Bone:219 (76%)<br>Liver:137 (47%)<br>Lymph nodes:101 (35%)<br>Lung:94 (33%)                                                                                                                             | Bone:111 (78%)<br>Liver:76 (53%)<br>Lymph nodes:49 (34%)<br>Lung:43 (30%)                                                                                                                            | Visceral:21<br>2 (73%)   | Visceral:103<br>(72%)    | ---      |
| Bone:367 (75.8%)<br>Bone only:103 (21.3%)<br><br>Lung:146 (30.2%)<br>Liver:134 (27.7%)<br>Lung or liver:242 (50.0%)<br>Central nervous system:6 (1.2%)<br>Other‡:102 (21.1%)<br>Lymph nodes:199 (41.1%) | Bone:180 (74.4%)<br>Bone only:51 (21.1%)<br><br>Lung:72 (29.8%)<br>Liver:63 (26.0%)<br>Lung or liver:121 (50.0%)<br>Central nervous system:2 (0.8%)<br>Other‡: 51 (21.1%)<br>Lymph nodes:115 (47.5%) | Visceral:29<br>3 (60.5%) | Visceral: 146<br>(60.3%) | ---      |
| 1 or 2: 13 (59%)<br>≥3: 9 (41%)                                                                                                                                                                         | 1 or 2: 13 (65%)<br>≥3: 7 (35%)                                                                                                                                                                      | 13 (59%)                 | 11 (55%)                 | 15 (68%) |

| e disease                        | Race                                                                                                  |                                                                                                       | ECOG performe                                        |
|----------------------------------|-------------------------------------------------------------------------------------------------------|-------------------------------------------------------------------------------------------------------|------------------------------------------------------|
| yes:164 (73.5%)<br>no:59 (26.5%) | Asian:149 (33.4%)<br>Caucasian:237 (53.1%)<br>Other:29 (6.5%)                                         | Asian:65 (29.1%)<br>Caucasian:136 (61.0%)<br>Other:13 (5.8%)                                          | 0:264 (59.2%)<br>1:176 (39.5%)                       |
| -----                            | -----                                                                                                 | -----                                                                                                 | 0:28 (59.6%)<br>1:18 (38.8%)<br>2:1 (2.1%)           |
| 42,65%                           | White 56 (85%)<br>Black 8 (12%)<br>Other 2 (3%)                                                       | White 49 (75%)<br>Black 11 (17%)<br>Other 5 (8%)                                                      | 0:40 (61)<br>1: 26 (39)                              |
| -----                            | White:402 (70%)<br>Asian:132 (23%)<br>Black:5 (1%)<br>Other:18 (3%)<br>Unknown or missing:<br>19 (3%) | White:376 (66%)<br>Asian:153 (27%)<br>Black:16 (3%)<br>Other:7 (1%)<br>Unknown or missing:<br>19 (3%) | 0:333 (58%)<br>1:231 (40%)<br>2:11 (2%)<br>3:1 (<1%) |

|          |                                                                                   |                                                                                         |          |
|----------|-----------------------------------------------------------------------------------|-----------------------------------------------------------------------------------------|----------|
| 43 (54%) | White: 78 (88%)<br>Asian: 5 (6%)<br>Black: 2 (2%)<br>Other: 4 (4%)<br>Multiple: 0 | White: 68 (86%)<br>Asian: 8 (10%)<br>Black: 1 (1%)<br>Other: 1 (1%)<br>Multiple: 1 (1%) | 0/1:100% |
|----------|-----------------------------------------------------------------------------------|-----------------------------------------------------------------------------------------|----------|

|                                   |                                                                  |                                                                  |                              |
|-----------------------------------|------------------------------------------------------------------|------------------------------------------------------------------|------------------------------|
| Any measurable disease: 138 (79%) | White: 252 (73%)<br>Asian: 74 (21%)<br>Black and others: 21 (6%) | White: 133 (76%)<br>Asian: 31 (18%)<br>Black and others: 10 (6%) | 0: 206 (59%)<br>1: 141 (41%) |
|-----------------------------------|------------------------------------------------------------------|------------------------------------------------------------------|------------------------------|

|                             |     |     |                                      |
|-----------------------------|-----|-----|--------------------------------------|
| yes:38 (64%)<br>no:21 (36%) | --- | --- | 0:37 (65%)<br>1:19 (33%)<br>2:1 (2%) |
|-----------------------------|-----|-----|--------------------------------------|

|            |     |     |                                         |
|------------|-----|-----|-----------------------------------------|
| 40 (58.8%) | --- | --- | 0: 33 (54%)<br>1: 27 (44%)<br>2: 1 (2%) |
|------------|-----|-----|-----------------------------------------|

|      |                 |                 |                 |
|------|-----------------|-----------------|-----------------|
| ---- | White 249 (86%) | White 121 (85%) | 0: 173 (60%)    |
|      | Asian 20 (77%)  | Asian 9 (6%)    | 1: 112 (39%)    |
|      | Black 4 (1%)    | Black 4 (3%)    | 2: 2 (1%)       |
|      | Other 7 (2%)    | Other 3 (2%)    | Missing: 2 (1%) |
|      | Unknown 9 (3%)  | Unknown 6 (4%)  |                 |

|      |                           |                           |                   |
|------|---------------------------|---------------------------|-------------------|
| ---- | White: 406 (83.9%)        | White: 213 (88.0%)        | 0: 310 (64.0%)    |
|      | Asian: 45 (9.3%)          | Asian: 18 (7.4%)          | 1: 173 (35.7%)    |
|      | Native American: 5 (1.0%) | Native American: 1 (0.4%) | Missing: 1 (0.2%) |
|      | Black: 3 (0.6%)           | Black: 2 (0.8%)           |                   |
|      | Unknown: 15 (3.1%)        | Unknown: 5 (2.1%)         |                   |
|      | Other: 10 (2.1%)          | Other: 3 (1.2%)           |                   |

15 (75%)

----

----

0: 16 (73%)  
1/2: 6 (27%)



| ance status                                    | Postmenopausal (%)       |                          | median length of follow-up                                                  | primary endpoint |
|------------------------------------------------|--------------------------|--------------------------|-----------------------------------------------------------------------------|------------------|
| 0:136 (61.0%)<br>1:87 (39.0%)                  | 371 (83.2%)              | 180 (80.7%)              | 19.5 months                                                                 | PFS              |
| 0:28 (56.0%)<br>1:20 (40.0%)<br>2:2 (4.0%)     | 未提及百分比<br>100%           | 未提及百分比<br>100%           | —                                                                           | PFS              |
| 0 :38 (58)<br>1:27 (42)                        | 未提及百分比<br>100%           | 未提及百分比<br>100%           | 19.3 months<br>(range, 0 to<br>36.3 months)                                 | PFS              |
| 0:344 (60%)<br>1:211 (37%)<br>2:16 (3%)<br>3:0 | postmenopausal<br>未提及百分比 | postmenopausal<br>未提及百分比 | 13.73 months<br>(IQR<br>5.45 - 19.81)<br>versus<br>14.32<br>(10.64 - 21.62) | PFS、ORR          |

|                                      |                          |                          |                                  |                |
|--------------------------------------|--------------------------|--------------------------|----------------------------------|----------------|
| 0/1:100%                             | postmenopausal<br>未提及百分比 | postmenopausal<br>未提及百分比 | 17.5 months<br>(IQR 15.4 - 19.4) | PFS            |
| 0: 116 (67%)<br>1: 58 (33%)          | 275 (79%)                | 138 (79%)                | 8.9 months (IQR<br>8.7 - 9.2).   | PFS            |
| 0:38 (64%)<br>1:20 (34%)<br>2:1 (2%) | postmenopausal<br>未提及百分比 | postmenopausal<br>未提及百分比 | ---                              | PFS            |
| 0: 36 (53)<br>1: 27 (40)<br>2: 5 (7) | postmenopausal<br>未提及百分比 | postmenopausal<br>未提及百分比 | ---                              | uNTx response. |

|                                                            |                          |                          |                                                                         |                              |
|------------------------------------------------------------|--------------------------|--------------------------|-------------------------------------------------------------------------|------------------------------|
| 0: 91 (64%)<br>1: 48 (34%)<br>2: 1 (1%)<br>Missing: 3 (2%) | postmenopausal<br>未提及百分比 | postmenopausal<br>未提及百分比 | 8.3 months (IQR<br>4.2 - 20.7) VS<br>12.0 months<br>(IQR<br>4.7 - 13.7) | progression-free<br>survival |
| 0: 158 (65.3%)<br>1: 83 (34.3%)<br>Missing: 1 (0.4%)       | ——                       | ——                       | 20.4 months                                                             | locally assessed<br>PFS      |
| 0: 13 (65%)<br>1/2: 7 (35%)                                | postmenopausal<br>未提及百分比 | postmenopausal<br>未提及百分比 | 22 months                                                               | DCR                          |

| secondary endpoint                                 | PFS                                                                                                              | ORR (CR+PR)                                                                                            |
|----------------------------------------------------|------------------------------------------------------------------------------------------------------------------|--------------------------------------------------------------------------------------------------------|
| ORR, duration of response, CBR                     | PFS:16.4 VS 9.3months<br>HR: 0.553;<br>95% CI: (0.449 , 0.681) P<0.001                                           | OR:2.82 ,P<.001)<br>157 (35.2%)<br>95%CI: (30.8% to 39.6%)<br>vs 36 (16.1%)<br>95%CI: (11.3% to 21.0%) |
| ORR, Median time to first response;DOR             | PFS:<br>5.5months(3.8 - 14.0)<br>vs<br>5.5months(3.5 - 10.7)<br>HR:0.68<br>95% CI: (0.41, 1.14)                  | 13 (27.7%)<br>95%CI: [15.6 - 42.6]<br>5 (10.0%)<br>95%CI: [3.3 - 21.8]                                 |
| objective response rate, clinical benefit rate, OS | 10.3<br>(95% CI, 7.6 to13.8 months; 5.1 (95% CI, 3.0 to 8.0 months)<br>P=0.02;<br>HR=0.61 [95% CI: 0.40 to 0.92] | 12, 18.2%, 95%CI:9.8, 29.6<br>8, 12.3%, 95%CI:5.5, 22.8                                                |
| OS, overall response, clinical benefit             | PFS:6.9(6.8 - 7.8)<br>5.0 months(4.0 - 5.2)<br>HR:0.78<br>95% CI: (0.67-0.89)<br>p=0.00021                       | overall response:<br>11.8% (95% CI9.3 - 14.7)<br>7.7% (5.7 - 10.2)                                     |

|                                                                   |                                                                           |                                   |
|-------------------------------------------------------------------|---------------------------------------------------------------------------|-----------------------------------|
|                                                                   | (6.6 months [95% CI 3.9 - 9.8])                                           | 7 (7.9% [95% CI 3.2 - 15.5])      |
| OR, clinical benefit, duration of response, the prognostic effect | (5.1 months [3.6 - 7.3])<br>[HR] 0.74<br>[95% CI 0.52 - 1.06];<br>p=0.096 | 5 (6.3% [2.1 - 14.2])<br>(p=0.70) |

|                                                  |                                                                      |                                                                                                                              |
|--------------------------------------------------|----------------------------------------------------------------------|------------------------------------------------------------------------------------------------------------------------------|
|                                                  | PFS:<br>9.5 (95% CI 9.2 - 11.0)                                      | 66, 19% (15.0 - 23.6) VS<br>15, 9% (4.9 - 13.8)                                                                              |
| ORR, clinical benefit, tumour tissue biomarkers, | 4.6 (95%CI: 3.5 - 5.6)<br>HR: 0.46<br>95%CI:0.36 - 0.59,<br>p<0.0001 | OR: 2.47 (1.36 - 4.91)                                                                                                       |
|                                                  |                                                                      | CR: 0.0% VS 4.2% (n, %)<br>PR: 66.19% VS 11.6%<br>Stable disease: 213.61%<br>vs 94.54%<br>Progressive disease: 58.17% 57.33% |

|                            |                                                            |     |
|----------------------------|------------------------------------------------------------|-----|
| CBR (for cross over trial) | 2.73 vs 2.69<br>HR:0.73<br>(95% (CI)=0.49, 1.09)<br>P=0.06 | --- |
|----------------------------|------------------------------------------------------------|-----|

|                           |                                                                                                            |                                                                                                                                        |
|---------------------------|------------------------------------------------------------------------------------------------------------|----------------------------------------------------------------------------------------------------------------------------------------|
| PFS, OS, RECIST response, | PFS: 5.8 months (95% CI 2.7 - 8.1) and 4.8 months (95% CI 2.7 - 5.4), HR=0.94 (95% CI 0.64 - 1.36), P=0.73 | RECIST best response: n (%)<br>PR: 0 (0) vs 3 (75)<br>P=0.47<br>SD: 9 (41) VS 14 (35)<br>PD: 11 (50) VS 18 (45)<br>NE: 2 (9) VS 5 (13) |
|---------------------------|------------------------------------------------------------------------------------------------------------|----------------------------------------------------------------------------------------------------------------------------------------|

|                                                                                                                                                                  |                                                                                                                                                                                 |                                                                                          |
|------------------------------------------------------------------------------------------------------------------------------------------------------------------|---------------------------------------------------------------------------------------------------------------------------------------------------------------------------------|------------------------------------------------------------------------------------------|
| overall survival, safety                                                                                                                                         | 3.9 months [95% CI 2.8 - 4.2] vs 1.8 months [1.5 - 2.8] HR=0.67, 95% CI 0.53 - 0.84, one-sided p=0.00030                                                                        | CR:1 PR:21 Overall response:22,8%, 95%CI:5-11 CR:0 PR:3 Overall response:3,2%, 95%CI:0-6 |
| overall survival (OS), overall response rate (ORR), clinical benefit rate, and safety and tolerability                                                           | 20.5 months (95% CI, 18.5 to 23.5 months) versus 12.8 months (95% CI, 10.9 to 16.3 months) HR=0.593 (95% CI, 0.480 to 0.732; P =0.001 {up to line:HR=0.565, 95%CI: 0.428-0.744} | 155, 32.4% (95% CI, 28.3% to 36.6%) versus 52, 21.5% (95% CI, 16.3% to 26.7%)            |
| overall response rate (OR, best response i.e. CR or PR), time to treatment failure (TTF, from randomisation to discontinuation of all trial treatment), duration | PFS:3.7 months (95% CI 1.9, 5.8) and 5.6 months (95% CI 3.4, 13.6)                                                                                                              | CR: 0 (0%) VS 0 (0%) PR: 1 (5%) VS 3 (15%)                                               |

| OS                                                                                                                                    | Median time to first response                | duration of response rate                       |
|---------------------------------------------------------------------------------------------------------------------------------------|----------------------------------------------|-------------------------------------------------|
|                                                                                                                                       | ---                                          | 67.8% vs 66.9%                                  |
|                                                                                                                                       | months:<br>2.0(1.5 - 18.8)<br>3.7(1.6 - 9.1) | months:<br>13.5 [5.5 - 16.6]<br>14.7 [3.3 - NE] |
| 28.3 months<br>(95% CI, 19.5 to 29.6 months)<br>31.4 months (95% CI, 21.8 to month not reached)<br>HR=1.31 [95% CI:0.72, 2.38] P=0.37 | ---                                          | ---                                             |
| ---                                                                                                                                   | ---                                          | ---                                             |

(9.43 months [4.1 to not estimable] vs 6.5 months [3.7 months to not estimable]; p=0.65

OS: 31.0 (23.3 - NR) vs  
NR, p=0.30



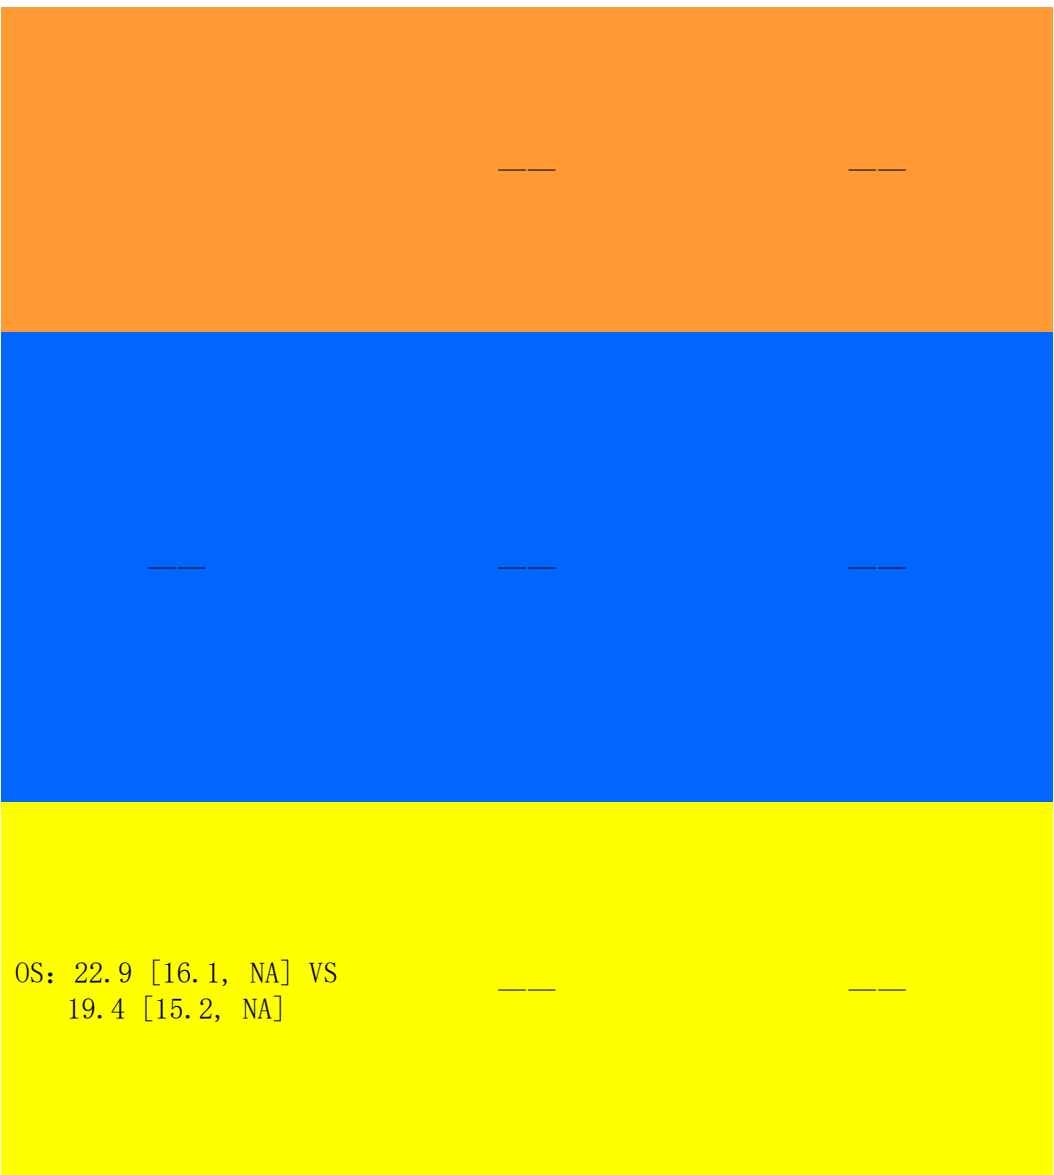

| Disease control rate<br>(CR + PR + SD)                                                          | Clinical benefit rate<br>(CR+PR+SD $\geq$ 6 months)                                              |
|-------------------------------------------------------------------------------------------------|--------------------------------------------------------------------------------------------------|
| OR:1.56 P=0.025<br>370 (83.0%)<br>95%CI: (79.5 to 86.4)<br>169 (75.8%)<br>95%CI: (70.2 to 81.4) | OR:2.04 , P<.001<br>322 (72.2%)<br>95%CI: (68.0 to 76.4)<br>125 (56.1%)<br>95%CI: (49.5 to 62.6) |
| ———                                                                                             | ———                                                                                              |
| ———                                                                                             | 42, 63.6%,<br>95%CI: 50.9, 75.1<br>27, 41.5%<br>95%CI: 29.4, 54.4                                |
| ———                                                                                             | 43.8% (95% CI<br>39.7 - 47.9)<br>42.0% (37.9 - 46.2)                                             |

—— 22 (24.7%) (95% CI  
16.2 - 35.0) versus 14  
(17.7%) (p=0.27)

—— 231, 67%  
(61.3 - 71.5) VS 69, 40%  
(32.3 - 47.3)  
OR: 3.05 (2.07 - 4.61)

—— ———

—— ———

71, 25%, 95%CI:20-30  
VS 22, 15%, 95%CI:10-22

340 (70.2%) 95% CI:66.2  
to 74.3 VS 152 (62.8%)  
95% CI:56.7 to 68.9

DCR:5 23% (95% CI:  
8 - 45%) VS  
10 50% (95% CI 27 - 75%)

| safety(adverse events)                                                                                                                                                                                                                                                                                                                                                               | safety simple size  | Grade                                                        |
|--------------------------------------------------------------------------------------------------------------------------------------------------------------------------------------------------------------------------------------------------------------------------------------------------------------------------------------------------------------------------------------|---------------------|--------------------------------------------------------------|
| <p>abemaciclib versus placebo arms were diarrhea (86.4% v 24.7%), neutropenia (46.0% v 4.0%), nausea (45.1% v22.9%), and fatigue (39.9% v 26.9%).</p>                                                                                                                                                                                                                                | <p>441      223</p> | <p>all:435 (98.6%)<br/>3级: 241 (54.6%)<br/>4级: 26 (5.9%)</p> |
| <p>The most common grade 3 AEs (occurring in <math>\geq</math> 10% of patients) in the dovitinib vs placebo arms were hypertension (21.3% vs 6.0%), diarrhea (14.9% vs 4.0%), alanine aminotransferase increase (14.9% vs 2.0%), fatigue (12.8%vs 2.0%), blood alkaline phosphatase increase (12.8% vs 0%), and <math>\gamma</math>-glutamyltransferase increase (10.6% vs 6.0%)</p> | <p>47      50</p>   | <p>47 (100%)<br/>3级: 32 (68.1%)<br/>4级: 8, 17%</p>           |
| <p>hyperglycemia (16%/0% vs. 0%), stomatitis (11%/0% vs. 0%), hypertriglyceridemia (9%/2% vs. 0%), lymphopenia (9%/0% vs. 0%), and pneumonitis (6%/2% vs. 0%)</p>                                                                                                                                                                                                                    | <p>64      65</p>   | <p>3/4级: 53%/3%</p>                                          |
| <p>The most common grade 3-4 adverse events in the buparlisib group versus the placebo group were increased alanine aminotransferase (146 [25%] of 573 patients vs six [1%] of 570), increased aspartate aminotransferase (103 [18%] vs 16 [3%]), hyperglycaemia (88 [15%] vs one[&lt;1%]), and rash (45 [8%] vs none)</p>                                                           | <p>573      570</p> | <p>---</p>                                                   |

|                                                                                                                                                                                                                                                                                                                                      |            |            |                                           |
|--------------------------------------------------------------------------------------------------------------------------------------------------------------------------------------------------------------------------------------------------------------------------------------------------------------------------------------|------------|------------|-------------------------------------------|
| <p>grade 3 or 4 adverse events were neutropenia (223 [65%] in the fulvestrant plus palbociclib group and one [1%] in the fulvestrant plus placebo group), anaemia (ten [3%] and three [2%]), and leucopenia (95 [28%] and two [1%]).</p>                                                                                             | <p>89</p>  | <p>79</p>  | <p>Grade <math>\geq 3</math>: 54, 61%</p> |
| <p>The most common adverse events in the fulvestrant/bortezomib combination arm compared with the fulvestrant alone arm included nausea (63 vs. 29%), diarrhea (47 vs. 8%), sensory neuropathy (46 vs. 29%), and limb edema (37 vs. 19%)</p>                                                                                         | <p>345</p> | <p>172</p> | <p>3/4级: 251 (73%) of 345</p>             |
| <p>14 (23.0 %) patients on FV and 9 (13.2 %) on FP experienced a grade 3 or greater serious or clinically significant AE (p= 0.17). 6 patients experienced a serious adverse event, 2 who received FV (diarrhoea and mucositis/stomatitis) and 4 who received FP (dehydration, pericarditis and 2 cases of pulmonary infection).</p> | <p>61</p>  | <p>68</p>  | <p>14, 23.0%</p>                          |

— 288 140 177, 61%

— 483 241

selumetinib - fulvestrant arm:

skin disorders (17 (73.9)), fatigue (12 (52.2)), nausea/vomiting(12 (52.2)), oedema(11 (47.8)), diarrhoea(10 (43.5)), mouth disorders(9 (39.1)) and muscle disorders(6 (26.1)).

Placebo: Nausea/vomiting: 9 (40.9)、Fatigue: 7 (31.8)、Diarrhoea: 7 (31.8)、Pain: 7 (31.8)、Eye disorders: 5 (22.7)、Skin disorders: 5 (22.7)

23

22

1级: 1 (4.3%)  
2级: 11 (47.8%)  
3级: 11 (47.8%)  
4级: 0 (0.0%)

3/4级

all:199 (89.2%)

3级 46 (20.6%)

4级: 5 (2.2%)

47 (94.0%)

3级: 19 (38.0)

4级: 6, 12%

3/4级: 23%/3%

---



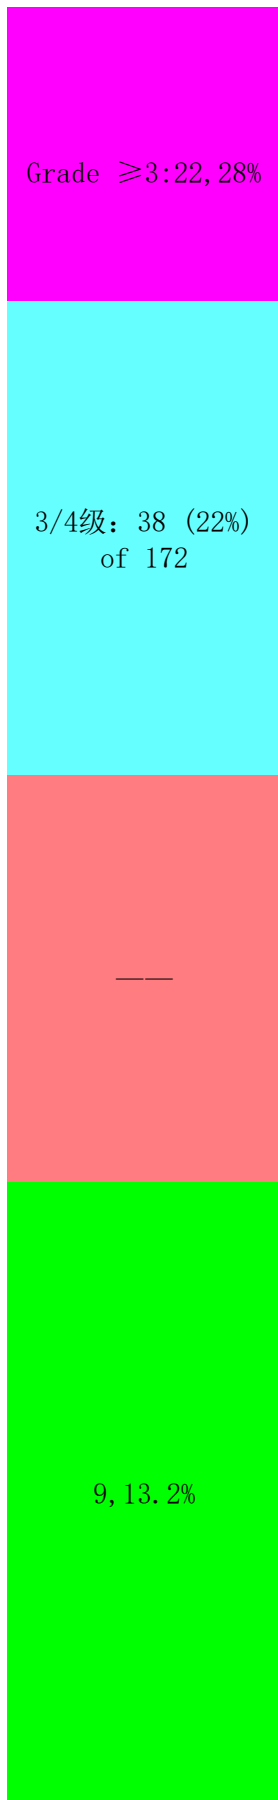

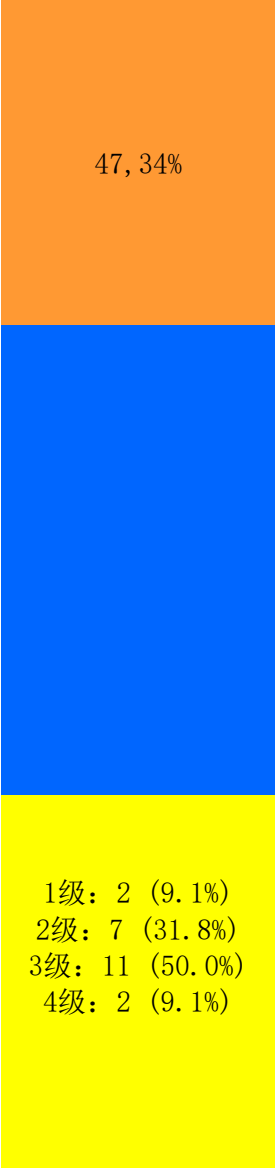

47, 34%

1级: 2 (9.1%)

2级: 7 (31.8%)

3级: 11 (50.0%)

4级: 2 (9.1%)
